# Supplementary material for: Circadian control of a sex-specific behavior in Drosophila
Source: eLife. 2026 May 18;13:RP103359. doi: 10.7554/eLife.103359 (PMC13183377; doi:10.7554/eLife.103359)
Supplement: Supplementary file 1. [file elife-103359-supp1.xlsx]

## Sheet: Table S2 CLK_to_OVI
		Pre	sLNv-1	sLNv-2	sLNv3	sLNv-4	l-LNv-1	l-LNV-2	l-LNv-3	l-LNv-4	LNd-1	LNd-2	LNd-3	LNd-4	LNd-5	LNd-6	5th LNV	DN1a-1	DN1a-2	DN1pA-1	DN1pA-2	DN1pA-3	DN1pA-4	DN1pA-5	DN1pB-1	DN1pB-2	LPN-1	LPN-2	LPN-3	LPN-L
Group	Instance	bodyID	2068801704	1664980698	2007068523	1975347348	1884625521	2065745704	5813001741	5813026773	296544364	448260940	5813064789	5813056917	5813021192	5813069648	511051477	264083994	5813022274	5813010153	324846570	325529237	387944118	387166379	386834269	5813071319	356818551	450034902	480029788	546977514
pC1 right	pC1a_R	5813046951											2	1
pC1 left	pC1a(PDM09)_L	359744514
pC1 right	pC1b_R	267214250									15	8	12
pC1 left	pC1b(PDM09)_L	392821837									4	2	1
pC1 right	pC1c_R	267551639										1
pC1 left	pC1c(PDM09)_L	550319575
pC1 right	pC1d_R	5813063587
pC1 left	pC1d(PDM09)_L	5813013342
pC1 right	pC1e_R	514850616
pC1 left(?)	(pc1)	297588821									2	2
oviIN right	oviIN_R	423101189												1	5													10	6
oviIN left	oviIN_L	485934965												12	7													1		1
oviEN right	SMP550_R	452689494
oviEN left	SMP550(PDM29)_L	579700707										2
oviDN right	oviDNa_R	550655668
oviDN left	oviDNb(PDM15)_L	642763374
oviDN right	oviDNb_R	519949044
oviDN right	oviDNa_R	450971893
G right	SLP212_R	5812980529
G left	SLP212(ADL27)_L	5813055769
G right	SLP212_R	359931311
G left	SLP212(ADL27)_L	519004170
G right	SLP212_R	5901203505
U right	PAL02_R	486544396
U left	PAL02(ADL27)_L	455500416

## Sheet: Table S3 OVI_to_CLK
		Post	sLNv-1	sLNv-2	SLNv-3	sLNv-4	l-LNv-1	l-LNV-2	l-LNv-3	l-LNv-4	LNd-1	LNd-2	LNd-3	LNd-4	LNd-5	LNd-6	5th LNV	DN1a-1	DN1a-2	DN1pA-1	DN1pA-2	DN1pA-3	DN1pA-4	DN1pA-5	DN1pB-1	DN1pB-2	LPN-1	LPN-2	LPN-3	LPN-L
Group	Instance	bodyID	2068801704	1664980698	2007068523	1975347348	1884625521	2065745704	5813001741	5813026773	296544364	448260940	5813064789	5813056917	5813021192	5813069648	511051477	264083994	5813022274	5813010153	324846570	325529237	387944118	387166379	386834269	5813071319	356818551	450034902	480029788	546977514
pC1 right	pC1a_R	5813046951
pC1 left	pC1a(PDM09)_L	359744514									1			1
pC1 right	pC1b_R	267214250										8	5																		c
pC1 left	pC1b(PDM09)_L	392821837										5	11
pC1 right	pC1c_R	267551639
pC1 left	pC1c(PDM09)_L	550319575
pC1 right	pC1d_R	5813063587
pC1 left	pC1d(PDM09)_L	5813013342
pC1 right	pC1e_R	514850616
pC1 left(?)	(pc1)	297588821
oviIN right	oviIN_R	423101189												3	2												18	32	35
oviIN left	oviIN_L	485934965												6	2												11	13	16	10
oviEN right	SMP550_R	452689494
oviEN left	SMP550(PDM29)_L	579700707
oviDN right	oviDNa_R	550655668
oviDN left	oviDNb(PDM15)_L	642763374
oviDN right	oviDNb_R	519949044
oviDN right	oviDNa_R	450971893
G right	SLP212_R	5812980529
G left	SLP212(ADL27)_L	5813055769
G right	SLP212_R	359931311
G left	SLP212(ADL27)_L	519004170
G right	SLP212_R	5901203505
U right	PAL02_R	486544396
U left	PAL02(ADL27)_L	455500416
